# Supplementary material for: Analysis of clinical benefit, harms, and cost-effectiveness of screening women for abdominal aortic aneurysm
Source: PubMed Central journal article supplement — Lancet. 2018 Aug 11;392(10146):487–95. doi: 10.1016/S0140-6736(18)31222-4 (PMC6087711; doi:10.1016/s0140-6736(18)31222-4), 2018-08-11
Supplement: mmc1.pdf [file mmc1.pdf]

# THE LANCET

## Supplementary appendix

This appendix formed part of the original submission and has been peer reviewed. We post it as supplied by the authors.

Supplement to: Sweeting MJ, Masconi KL, Jones E, et al. Analysis of clinical benefit, harms, and cost-effectiveness of screening women for abdominal aortic aneurysm. *Lancet* 2018; published online July 26. [http://dx.doi.org/10.1016/S0140-6736\(18\)31222-4](http://dx.doi.org/10.1016/S0140-6736(18)31222-4).

|    |                                                                                                                       |    |
|----|-----------------------------------------------------------------------------------------------------------------------|----|
| 1  | <b>Supplement for</b>                                                                                                 |    |
| 2  |                                                                                                                       |    |
| 3  | <b>Should we screen women for abdominal aortic aneurysm? Analysis of clinical benefit, harms and</b>                  |    |
| 4  | <b>cost-effectiveness</b>                                                                                             |    |
| 5  | Michael J Sweeting, Katya L Masconi, Edmund Jones, Pinar Ulug, Matthew J Glover, Jonathan A                           |    |
| 6  | Michaels, Matthew J Bown, Janet T Powell, Simon G Thompson                                                            |    |
| 7  |                                                                                                                       |    |
| 8  | <b>Containing:</b>                                                                                                    |    |
| 9  |                                                                                                                       |    |
| 10 | <b><u>Supplementary Methods</u></b>                                                                                   |    |
| 11 | <b>Supplementary Figure 1.</b> Structure of the discrete event simulation model .....                                 | 2  |
| 12 | 1. Baseline aortic diameter distribution .....                                                                        | 3  |
| 13 | 2. An alternative diagnosis threshold for women .....                                                                 | 3  |
| 14 | 3. A model for aortic growth .....                                                                                    | 3  |
| 15 | 4. Operative mortality and non-intervention rates .....                                                               | 5  |
| 16 | 5. Incidental detection rate .....                                                                                    | 6  |
| 17 | 6. Cost discounting .....                                                                                             | 6  |
| 18 |                                                                                                                       |    |
| 19 | <b>Supplementary Table 1.</b> Input parameters for the reference case, probability distributions used in              |    |
| 20 | probabilistic sensitivity analyses (PSA) and deterministic sensitivity analyses (DSA) inputs.....                     | 7  |
| 21 | 7. Patient and public involvement.....                                                                                | 11 |
| 22 |                                                                                                                       |    |
| 23 |                                                                                                                       |    |
| 24 | <b><u>Supplementary Results</u></b>                                                                                   |    |
| 25 | <b>Supplementary Figure 2.</b> A) Cumulative elective operations and B) cumulative emergency operations in the        |    |
| 26 | invited to screening vs. not invited to screening groups in the reference case per 1 million women. C)                |    |
| 27 | Cumulative elective operations and D) cumulative emergency operations in the invited to screening vs.                 |    |
| 28 | not invited to screening groups in the best alternative strategy per 1 million women. ....                            | 13 |
| 29 | <b>Supplementary Figure 3.</b> Estimates of a) incremental QALYs, b) costs and c) the cost-effectiveness ratio over   |    |
| 30 | time in the reference case, up to 30 years after invitation to screening.....                                         | 14 |
| 31 | <b>Supplementary Figure 4.</b> Cost-effectiveness of invitation to AAA screening with 1,000 probabilistic sensitivity |    |
| 32 | analysis iterations for A) the reference case, and B) the best alternative screening strategy. The blue and           |    |
| 33 | red lines indicate willingness-to-pay thresholds of £20,000 and £30,000 per QALY.....                                 | 15 |
| 34 |                                                                                                                       |    |
| 35 | <b>Supplementary Table 2.</b> Numbers of AAA ruptures in the reference case and best alternative strategy, for 1      |    |
| 36 | million women .....                                                                                                   | 16 |
| 37 | <b>Supplementary Table 3.</b> Effect of health related quality of life decrements on mean QALYs and the               |    |
| 38 | incremental cost-effectiveness ratio .....                                                                            | 17 |
| 39 |                                                                                                                       |    |
| 40 | <b><u>References</u></b> .....                                                                                        | 18 |

41 **Supplementary Methods**

42 **Supplementary Figure 1.** Structure of the discrete event simulation model

43

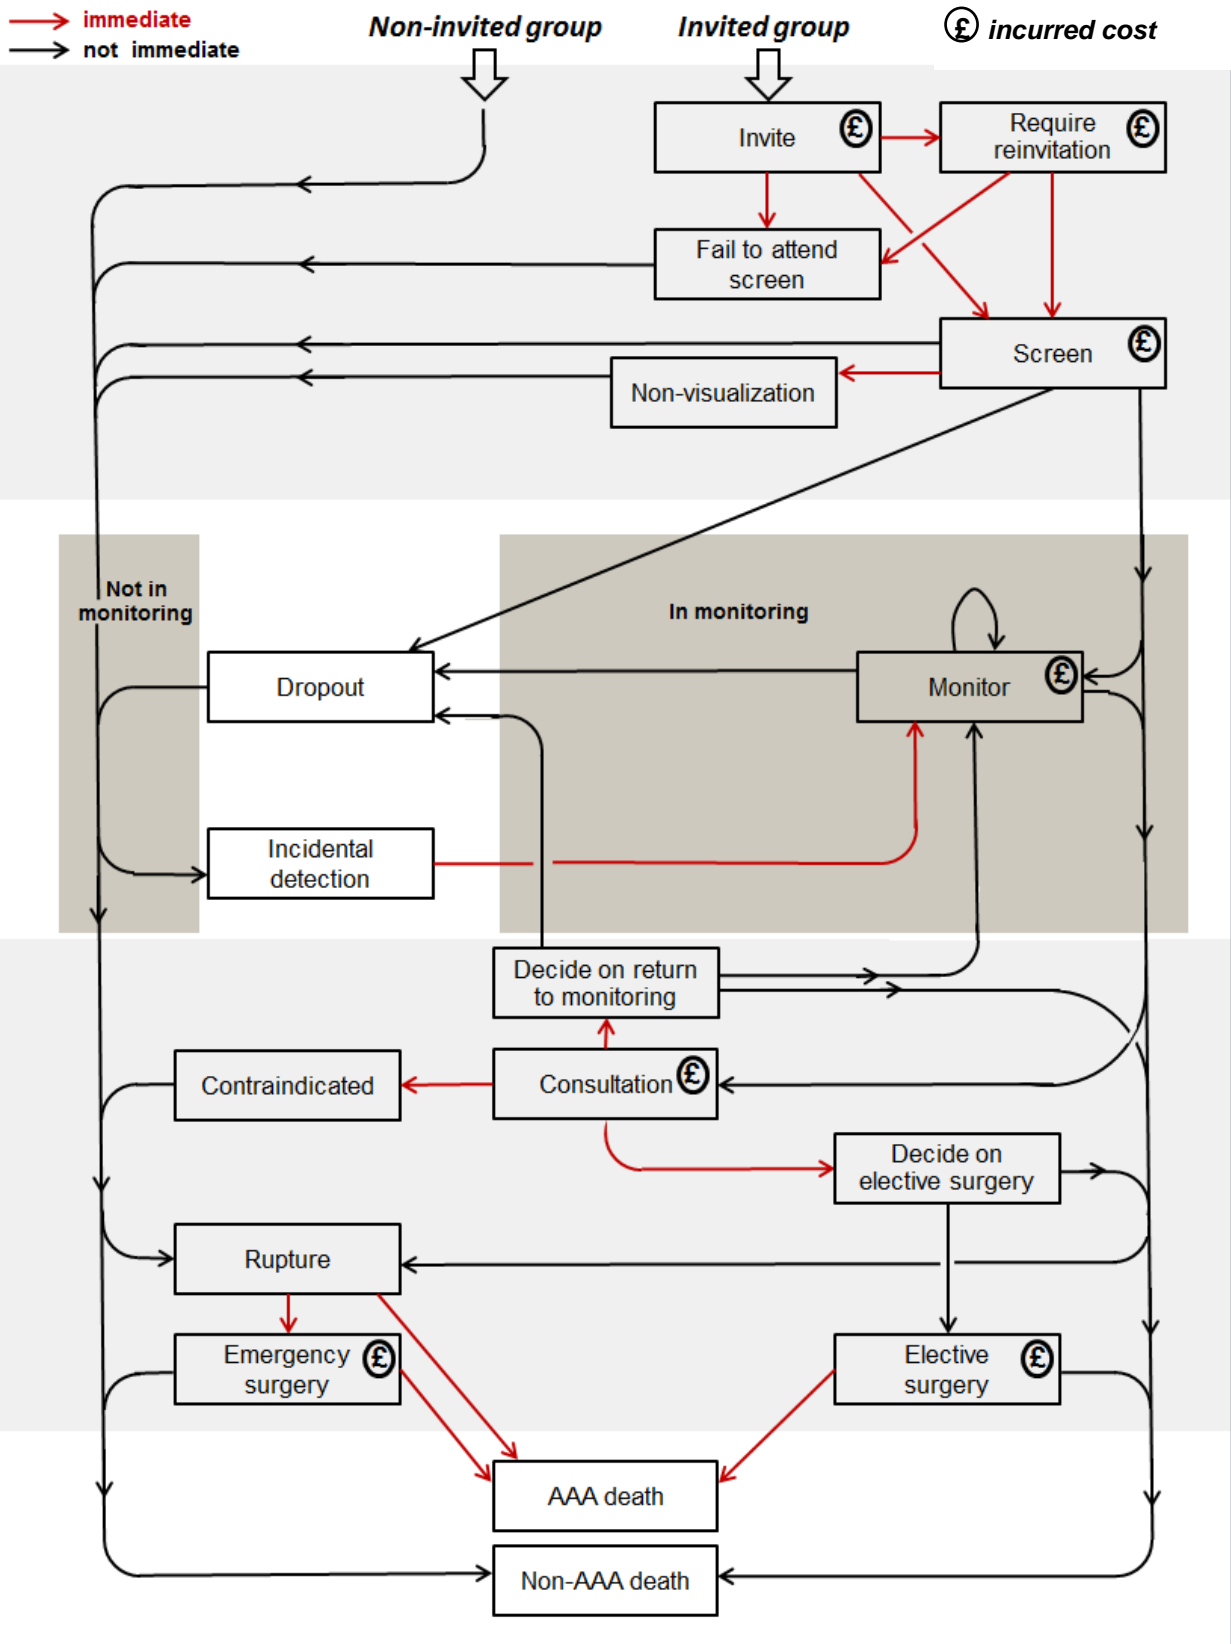

44

45 1. Baseline aortic diameter distribution

46

47 The distribution of diameters measured in the first 700,000 men screened in NAAASP<sup>1</sup> or from  
48 screening of 70 year old women in Sweden<sup>2</sup> were re-weighted to give the desired AAA prevalence in  
49 women, estimates of which were obtained from a systematic review<sup>3</sup>. A linear re-weighting  
50 approach was taken using the following algorithm:

51

52 1. Let  $p_{NAAASP}$  be the prevalence of AAA calculated in the NAAASP aortic diameter distribution  
53 for men and  $p_{WOMEN}$  the prevalence in women that we wish to re-calibrate the distribution  
54 to. Each aortic diameter size  $x$  (accurate to 1mm) in the NAAASP distribution has an  
55 associated probability weight  $w(x)$  indicating the proportion of individuals in the  
56 distribution who were screened with that diameter. The weights sum up to 1. It follows  
57 that

$$p_{NAAASP} = \sum_{x \geq 3.0} w(x)$$

58

59 2. Given the desired prevalence,  $p_{WOMEN}$ , new weights  $w^*(x)$  are calculated, as follows:

$$w^*(x) = f(x)w(x)$$

60 where  $f(x) = a + bx$  is a linear function of  $x$ . The conditions that must be satisfied are

61 i.  $\sum_{x \geq 3.0} f(x)w(x) = p_{WOMEN}$

62 ii.  $\sum_x f(x)w(x) = 1$

63 The solution to this pair of simultaneous equations is

$$b = \frac{p_{NAAASP} - p_{WOMEN}}{p_{NAAASP} \sum_x x w(x) - \sum_{x \geq 3.0} x w(x)}$$
$$a = 1 - b \sum_x x w(x)$$

64

65 After re-weighting, some of the new weights may be negative. If this occurred, we set the weights  
66 to zero and then a further re-weighting step was performed to ensure the weights above the  
67 diagnosis threshold (e.g. 3.0cm) summed to the desired prevalence.

68

69 2. An alternative diagnosis threshold for women

70

71 Data from aneurysm screening in 5140 women aged 70 in Uppsala and Dalarna, Sweden, were  
72 obtained to investigate an alternative threshold for AAA in women based on the definition of being  
73 50% larger than a normal aortic diameter<sup>4</sup>. The mean (leading edge to leading edge) diameter in  
74 these women was 1.66cm and an aortic diameter of 2.5cm was 3.2 standard deviations (SDs) (or  
75 51%) higher than the mean, whilst a diameter of 3.0cm was 5.2 SDs (or 81%) higher than the mean.  
76 In men screened in NAAASP an (inner to inner) diameter of 3.0cm is 3.4 SDs (or 68%) above the  
77 mean. This suggests that 2.5cm might be an appropriate alternative threshold for women.

78

79 3. A model for aortic growth

80

81 The evolution of an individual's aortic diameter over time affects many aspects of the health  
82 economic model, namely: 1) when an individual can be diagnosed, 2) planned surveillance intervals,  
83 3) when an intervention can be considered, 4) the risk of rupture, 5) the probability of receiving  
84 EVAR rather than open repair, and 6) the operative mortality risk. Hence, the trajectory of the aortic  
85 diameter was modelled using a continuous-time linear mixed model. Letting  $y_{ij}$  be the aortic

86 diameter, as measured using ultrasound, of woman  $i$  at time  $t_{ij}$ ,  $j = 1, \dots, n_i$ ; so  $y_{i0}$  is the baseline  
 87 diameter as measured at screening. A linear mixed model was specified as follows:

$$\begin{aligned} \log(y_{ij}) &= b_{0i} + b_{1i}t_{ij} + \epsilon_{ij} \\ &= m_{ij} + \epsilon_{ij} \\ (b_{0i}, b_{1i})^T &\sim N_2(\beta, G) \\ \text{where } \epsilon_{ij} &\sim N(0, \sigma_w^2) \\ \beta &= \begin{pmatrix} \beta_0 \\ \beta_1 \end{pmatrix} \\ G &= \begin{pmatrix} \sigma_0^2 & \rho\sigma_0\sigma_1 \\ \rho\sigma_0\sigma_1 & \sigma_1^2 \end{pmatrix} \end{aligned}$$

89  
 90 Each woman has two random effects: their intercept  $b_{0i}$  (true log aortic diameter at the time of  
 91 screening), and their slope  $b_{1i}$  (rate of growth), measured on the log diameter scale. Correlation  
 92 between an woman's underlying baseline log diameter and slope was incorporated through the  
 93 correlation parameter  $\rho$ . The parameters  $\sigma_0^2$  and  $\sigma_1^2$  determine the between-person variability of  
 94 the intercepts and slopes, respectively, whilst  $\sigma_w^2$  determines the amount of variability due to  
 95 measurement error.

96  
 97 The linear mixed model was fitted using data from repeated ultrasound measurements of the aortic  
 98 diameter from 11 cohorts of women with AAA from the RESCAN collaboration<sup>5</sup>, with a total of 1743  
 99 women providing 4800 person-years for analysis. Parameter estimates were obtained via restricted  
 100 maximum likelihood estimation for each study separately, and in a second state, study-specific  
 101 estimates were pooled via multivariate random-effects meta-analysis.

102  
 103 The 11 RESCAN cohorts were restricted to the diameter range of 3.0 to 5.5cm. As a result, external  
 104 data sources and model extrapolation were used to sample true baseline diameters and growth  
 105 rates for women outside of this range. The baseline diameter  $y_{i0}$  was sampled from a fixed  
 106 distribution, which was specified using external data sources. The base case model used the  
 107 distribution of diameters measured in the first 700,000 men screened in NAAASP, reweighted to give  
 108 the desired AAA prevalence. An individual's random effects  $b_{0i}$  and  $b_{1i}$  were then generated  
 109 conditional on their observed baseline diameter. A set of rules were developed to ensure that  
 110 extrapolated growth rates below 3.0cm were sensible and approximated empirical data obtained  
 111 from a group of men followed up over time with initial diameter 2.6-2.9cm<sup>6</sup>. The rules were as  
 112 follows:

- 113  
 114  
 115 1. If  $y_{i0} \geq 3.0$  then random-effects were generated directly from the linear mixed model  
 116 posterior distribution

117 Since estimated parameters from the linear mixed model are strictly relevant only to  
 118 baseline diameters  $\geq 3.0$ cm, then for individuals in this range,  $b_{0i}$  and  $b_{1i}$  are generated from  
 119 their bivariate normal distribution conditional on the observed diameter,  $y_{i0}$ :

$$(b_i | y_{i0}) \sim N_2(\mu_b, \Sigma_b)$$

120 where

$$\begin{aligned} \mu_b &= \beta + \begin{pmatrix} \sigma_0^2 \\ \rho\sigma_0\sigma_1 \end{pmatrix} \frac{\log(y_{i0}) - \beta_0}{\sigma_0^2 + \sigma_w^2} \\ \Sigma_b &= \begin{pmatrix} \sigma_0^2 + \sigma_w^2 & \rho\sigma_0\sigma_1\sigma_w^2 \\ \rho\sigma_0\sigma_1\sigma_w^2 & \sigma_0^2\sigma_1^2(1 - \rho^2) + \sigma_1^2\sigma_w^2 \end{pmatrix} \end{aligned}$$

- 121  
 122 2. If  $y_{i0} < 3.0$  then an individual's true baseline diameter was set to their observed diameter

123 This avoids shrinkage of the true baseline diameter upwards towards the mean in the  
124 RESCAN cohort used to fit the linear mixed model.

125

126 3. If  $2.0 \leq y_{i0} < 3.0$  then an individual's rate of growth was generated from their posterior  
127 distribution conditional on  $b_{i0}$ :

128

$$(b_{1i}|b_{0i}) \sim N(\mu_{b1}, \sigma_{b1}^2)$$

129 where

$$\mu_{b1} = \beta_1 + \frac{\rho\sigma_1}{\sigma_0}(b_{0i} - \beta_0)$$
$$\sigma_{b1}^2 = (1 - \rho^2)\sigma_1^2$$

130

131 4. If  $y_{i0} < 2.0$  then an individual's rate of growth to zero was set to zero

132 This rule implies that no individuals measured below 2.0cm at baseline will grow during their  
133 lifetime.

134

135 The effect of the extrapolation rules set out above was investigated in validation studies conducted  
136 in men, with outputs from the model compared against data from the randomised Multicentre  
137 Aneurysm Screening Study; further details of which of given in Glover et al. 2018<sup>7</sup>. It should be noted  
138 that incremental effects (e.g. incremental QALYs, increments costs and the ICER) are robust to the  
139 choice of growth rates below the diagnosis threshold, since individuals below the diagnosis  
140 threshold at time of screening follow the same life course in both screened and non-screened  
141 populations.

142

143 The rate of AAA rupture was assumed to depend on the underlying AAA diameter and was modelled  
144 using a joint longitudinal and time-to-event model with the hazard of rupture for woman  $i$  at time  $t$   
145 specified as

$$h_i(t) = \exp\left(\gamma + \alpha(b_{0i} + b_{1i}t_{ij})\right)$$

147 where  $\gamma$  is the log baseline hazard and  $\alpha$  is the log hazard ratio associated with a one unit increase in  
148 log aortic diameter (the expression in the inner brackets). The hazard function corresponds to a  
149 Gompertz distribution with shape parameter  $\alpha b_{1i}$  and rate parameter  $\exp(\gamma + \alpha b_{0i})$ . The (primary)  
150 rupture risk was set to zero at the time a woman underwent a successful elective AAA operation.

151

152 Six RESCAN studies provided data on both AAA growth and rupture. The model was fitted separately  
153 within each study before pooling estimates using multivariate random-effects meta-analysis. Since  
154 ruptures were rare, we used data from both 1071 women and 5358 men, contributing 49 and 92  
155 AAA rupture events, respectively, and a total of 21,658 person-years of follow-up. We allowed for  
156 sex differences in AAA diameter and rate of rupture by including sex as a covariate in both the  
157 longitudinal (growth) and time-to-event (rupture) sub-models. A linear relationship between  
158 log(diameter) and time was assumed to model the growth of an aneurysm.

159

#### 160 4. Operative mortality and non-intervention rates

161

162 Data on operative mortality rates for both endovascular and open aneurysm repairs, and elective  
163 and emergency operations were extracted from the UK National Vascular Registry (NVR)<sup>8</sup> and  
164 Hospital Episode Statistics (HES) data<sup>9</sup>, which contains details of all admissions, outpatient  
165 appointments and A&E attendances at NHS hospitals in England. NVR contains data on in-hospital  
166 mortality and HES contains data on both 30-day and in-hospital mortality. NVR was the principal  
167 source used for surgical parameters for women since data from this registry were used to create age  
168 and AAA diameter-specific estimates using logistic regression models. The NVR in-hospital mortality

169 was then adjusted to reflect the (greater) 30-day mortality with a log odds ratio corresponding to  
170 the 30-day mortality vs. in-hospital mortality in HES. EVAR was used in ~60% of elective repairs  
171 recorded in NVR, but in <50% for women aged less than 75<sup>10</sup>. The overall estimated 30-day mortality  
172 rates were 2.4% for elective endovascular repair, 8.1% for elective open repair, 35.9% for emergency  
173 endovascular repair, and 44.2% for emergency open repair. Non-intervention rates were obtained  
174 from a systematic review<sup>11</sup>.

## 175 5. Incidental detection rate

176

177 In the discrete event simulation model all incidental detections were assumed to thereafter follow  
178 the same surveillance protocol as a screen-detected AAA (i.e. surveillance for those detected below  
179 the intervention threshold, and referral for consideration of surgery for those detected above the  
180 intervention threshold).

181 Data on the incidental detection rate were obtained from a study conducted in Canterbury, New  
182 Zealand in which 165 new incidental AAAs were detected in men and women from CT scans over the  
183 period of 4.25 years<sup>12</sup>. About a quarter of all detected AAAs (incidental and known) were in women.  
184 Assuming this proportion also applies to the incidental AAAs and that 97% of AAAs were in  
185 individuals aged 65 and over, then there would be approximately 40 AAAs detected in women aged  
186  $\geq 65$  years. From census data, the 2006 population of women  $\geq 65$  years for the catchment area  
187 (Canterbury, West Coast, and Timaru regions of South Island, New Zealand) is approximately 43,500.  
188 Based on a prevalence of 0.74% for women  $\geq 65$  years<sup>3</sup>, 321 of these women have an aneurysm. This  
189 would indicate an incidental detection rate of approximately  $40 / (321 \times 4.25) = 2.93$  per 100 person-  
190 years for women  $\geq 65$  years with an AAA. This is similar to the rate of 4.6 per 100 person-years used  
191 in the most recent health-economic model for men<sup>13</sup>.

192 The rate is also similar to data from electronic hospital records of women aged 65 years and over  
193 undergoing CT scanning obtained from the University Hospital of South Manchester in 2014; 2494  
194 women underwent an abdominal CT during this period, and 65 AAAs were identified. Of these, 53  
195 were newly identified AAAs, but only 7 were referred on to vascular surgeons to be followed up with  
196 surveillance or elective surgery. The population (women  $\geq 65$  years) of the referral catchment area  
197 for the university hospital is approximately 24,500. Assuming that 181 (0.74%) of these women have  
198 an aneurysm this would indicate an incidental detection rate to a surveillance programme of  
199 approximately  $7 / 181 = 3.9$  per 100 person-years for women  $\geq 65$  years with an AAA.

200

## 201 6. Cost discounting

202

203 The cost discounting rate of 3.5% was as recommended by the UK Treasury (Finance Ministry)<sup>14</sup>.

204 **Supplementary Table 1.** Input parameters for the reference case, probability distributions used in  
 205 probabilistic sensitivity analyses (PSA) and deterministic sensitivity analyses (DSA) inputs

206

| Parameter                                                     | Source                                                              | Reference model                                                              | PSA                                                                         | DSA                                                                                             |
|---------------------------------------------------------------|---------------------------------------------------------------------|------------------------------------------------------------------------------|-----------------------------------------------------------------------------|-------------------------------------------------------------------------------------------------|
| <b>Screening</b>                                              |                                                                     |                                                                              |                                                                             |                                                                                                 |
| Re-invitation proportion                                      | NAAASP (unpublished)                                                | 142,127 / 594,376 $\approx$ 0.239                                            | None                                                                        | None                                                                                            |
| Attendance proportion                                         | Scott et al. 2002 <sup>15</sup>                                     | 218 / 300 $\approx$ 0.727                                                    | Beta(218,82)                                                                | None                                                                                            |
| Non-visualisation proportion                                  | NAAASP (unpublished)                                                | 1652 / 470,531 $\approx$ 0.0035                                              | None                                                                        | None                                                                                            |
| AAA size distribution at screening                            | NAAASP (unpublished)                                                | NAAASP distribution, reweighted to give 0.0043 prevalence                    | NAAASP distribution based on uncertain prevalence (see below)               | Uppsala distribution, reweighted to give 0.0043 prevalence                                      |
| Prevalence proportion                                         | Ulug et al. 2016 <sup>3</sup>                                       | 0.0042756                                                                    | Based on Normal (-5.45054, 0.32321 <sup>2</sup> ) distribution for logit(p) | a) 0.0021378<br>b) 0.0085512                                                                    |
| <b>AAA growth &amp; rupture</b>                               |                                                                     |                                                                              |                                                                             |                                                                                                 |
| AAA growth                                                    | Thompson et al. 2013 <sup>5</sup>                                   | Mixed linear model for log AAA diameter *                                    | Using variance – covariance matrix for the 6 parameters **                  | None                                                                                            |
| AAA rupture                                                   | Thompson et al. 2013 <sup>5</sup>                                   | Joint model for log rupture rates and log underlying AAA diameter †          | Using variance – covariance matrix for the 2 parameters ‡                   | None                                                                                            |
| <b>Surveillance</b>                                           |                                                                     |                                                                              |                                                                             |                                                                                                 |
| Dropout rate from surveillance                                | NAAASP (unpublished)                                                | 1072 / 19,650 $\approx$ 0.0546 per year                                      | Gamma(1072, 19650)                                                          | a) 0.0273 per year<br>b) 0.1092 per year                                                        |
| Incidental detection rate                                     | Khashram et al. 2015 <sup>12</sup>                                  | 40 / 1364.25 $\approx$ 0.0293 per year                                       | Gamma(40, 1364.25)                                                          | a) 0.0147 per year<br>b) 0.0586 per year                                                        |
| Delay from 5.5+cm scan to consultation                        | NAAASP (unpublished)                                                | 10.6 days                                                                    | None                                                                        | None                                                                                            |
| Consultation scan                                             | Thompson et al. 2013 <sup>5</sup> , Singh et al. 2003 <sup>16</sup> | CT is on average 0.244cm greater than US; measurement error SD 0.19cm for CT | None                                                                        | None                                                                                            |
| Decision at consultation: proportion returned to surveillance | N/A                                                                 | Modelled directly from AAA measurements by CT                                | N/A                                                                         | N/A                                                                                             |
| Decision at consultation: non-intervention proportion         | Meta-analysis from four hospitals (Ulug et al. 2017 <sup>11</sup> ) | 0.34226 of those not returned to surveillance                                | Based on Normal (-0.65324, 0.13502 <sup>2</sup> ) distribution for logit(p) | 0.233 at age 80 of those not returned to surveillance. Odds ratio 1.20 per year increase in age |
| Decision at consultation: proportion elective surgery         | N/A                                                                 | 1 – 0.34226 = 0.65774 of those not returned to surveillance                  | Obtained by subtraction                                                     | Obtained by subtraction                                                                         |
| Delay from consultation scan to elective surgery              | NAAASP (unpublished)                                                | 70.8 days                                                                    | None                                                                        | None                                                                                            |

207



208 **Supplementary Table 1 continued**

| <b>Elective operations</b>                                |                                                            |                                                                                                                  |                                                                            |                                                                                                                                                                                                           |
|-----------------------------------------------------------|------------------------------------------------------------|------------------------------------------------------------------------------------------------------------------|----------------------------------------------------------------------------|-----------------------------------------------------------------------------------------------------------------------------------------------------------------------------------------------------------|
| Proportion receiving EVAR vs. open repair                 | NVR (unpublished)                                          | 0.67 at age 80, AAA diameter 6.0cm. Odds ratio 1.10 per year increase in age, 0.74 per cm increase in diameter   | Based on multivariate normal from logistic regression parameters           | 0.3396 based on systematic review of EVAR suitability                                                                                                                                                     |
| EVAR 30-day operative mortality                           | NVR <sup>10</sup> , HES (unpublished)                      | 0.027 at age 80, AAA diameter 6.0cm. Odds ratio 1.002 per year increase in age, 0.97 per cm increase in diameter | Based on multivariate normal from logistic regression parameters           | 0.0223 based on systematic review                                                                                                                                                                         |
| Open repair 30-day operative mortality                    | NVR <sup>10</sup> , HES (unpublished)                      | 0.103 at age 80, AAA diameter 6.0cm. Odds ratio 1.07 per year increase in age, 1.08 per cm increase in diameter. | Based on multivariate normal from logistic regression parameters           | a) 0.0537 based on systematic review<br>b) 0.05                                                                                                                                                           |
| Re-intervention rate after successful EVAR                | EVAR1 RCT <sup>17</sup>                                    | 20.3 and 6.4 per 100 women-years during 31-120 and >120 days respectively                                        | Based on Gamma(3, 15) and Gamma(27, 421) respectively                      | None                                                                                                                                                                                                      |
| Re-intervention rate after successful open repair         | EVAR1 RCT <sup>17</sup>                                    | 0.0                                                                                                              | None                                                                       | a) Based on DREAM/OVER RCT rates in men, since these trials include incisional hernias. Overall rate across two trials combined: 4.4 and 2.9 per 100 women-years during 31-120 and >120 days respectively |
| Long-term AAA mortality rate after successful EVAR        | EVAR1 RCT <sup>17</sup>                                    | 1.799 per 100 women-years                                                                                        | Based on Gamma(8, 444.7)                                                   | None                                                                                                                                                                                                      |
| Long-term AAA mortality rate after successful open repair | EVAR1 RCT <sup>17</sup>                                    | 0.499 per 100 women-years                                                                                        | Based on Gamma(2, 400.8)                                                   | None                                                                                                                                                                                                      |
| <b>Emergency operations</b>                               |                                                            |                                                                                                                  |                                                                            |                                                                                                                                                                                                           |
| % operated after rupture                                  | Literature review (unpublished), IMPROVE RCT <sup>18</sup> | 0.25                                                                                                             | Based on Normal(0.25, 0.05 <sup>2</sup> ), with truncation to within [0,1] | None                                                                                                                                                                                                      |
| Proportion receiving EVAR vs. open repair                 | NVR (unpublished)                                          | 0.18 at age 80. Odds ratio 1.04 per year increase in age                                                         | Based on multivariate normal from logistic regression parameters           | None                                                                                                                                                                                                      |
| EVAR 30-day operative mortality                           | NVR <sup>10</sup> , HES (unpublished)                      | 0.35 at age 80. Odds ratio 1.06 per year increase in age                                                         | Based on multivariate normal from logistic regression parameters           | 0.32 based on systematic review                                                                                                                                                                           |
| Open repair 30-day operative mortality                    | NVR <sup>10</sup> , HES (unpublished)                      | 0.46 at age 80. Odds ratio 1.03 per year increase in age                                                         | Based on multivariate normal from logistic regression parameters           | 0.51 based on systematic review                                                                                                                                                                           |
| Re-intervention rate after successful EVAR                | IMPROVE RCT <sup>18</sup>                                  | 15.8 per 100 women-years                                                                                         | Based on Gamma(9, 57)                                                      | None                                                                                                                                                                                                      |
| Re-intervention rate after successful open repair         | IMPROVE RCT <sup>18</sup>                                  | 2.3 per 100 women-years                                                                                          | Based on Gamma(2, 85)                                                      | None                                                                                                                                                                                                      |
| Long-term AAA mortality rate after successful EVAR        | IMPROVE RCT <sup>18</sup>                                  | 0.0                                                                                                              | None                                                                       | 0.985 per 100 women-years based on men                                                                                                                                                                    |
| Long-term AAA mortality rate after successful open repair | IMPROVE RCT <sup>18</sup>                                  | 1.613 per 100 women-years                                                                                        | Based on Gamma(2, 124)                                                     | 1.437 per 100 women-years based on men                                                                                                                                                                    |

210 **Supplementary Table 1** continued

| <b>Costs</b>                         |                                                                                 |                                                                                |                                                                                                 |                                                                                                                                                                                                       |
|--------------------------------------|---------------------------------------------------------------------------------|--------------------------------------------------------------------------------|-------------------------------------------------------------------------------------------------|-------------------------------------------------------------------------------------------------------------------------------------------------------------------------------------------------------|
| Invitation, re-<br>invitation        | NAAASP<br>(unpublished)                                                         | £1.80                                                                          | In all cases:<br>Based on Normal(log(base-case<br>estimate), 0.114 <sup>2</sup> ) for log costs | In all cases:<br>a) Base-case estimate * 0.80<br>b) Base-case estimate * 1.25                                                                                                                         |
| Screening scan                       | NAAASP<br>(unpublished)                                                         | £34.11                                                                         |                                                                                                 |                                                                                                                                                                                                       |
| Surveillance scan                    | NAAASP<br>(unpublished)                                                         | £72.03                                                                         |                                                                                                 |                                                                                                                                                                                                       |
| Consultation for<br>elective surgery | MASS <sup>19</sup> , NHS<br>Reference costs<br>2014/15                          | £328.64                                                                        |                                                                                                 |                                                                                                                                                                                                       |
| Elective EVAR repair                 | EVAR1 <sup>17</sup> , HES<br>(unpublished),<br>NHS Reference<br>costs 2014/15   | £13,844                                                                        |                                                                                                 |                                                                                                                                                                                                       |
| Elective open repair                 | EVAR1 <sup>17</sup> , HES<br>(unpublished),<br>NHS Reference<br>costs 2014/15   | £13,060                                                                        |                                                                                                 |                                                                                                                                                                                                       |
| Emergency EVAR<br>repair             | IMPROVE <sup>18</sup> , HES<br>(unpublished),<br>NHS Reference<br>costs 2014/15 | £16,154                                                                        |                                                                                                 |                                                                                                                                                                                                       |
| Emergency open<br>repair             | IMPROVE <sup>18</sup> , HES<br>(unpublished),<br>NHS Reference<br>costs 2014/15 | £17,613                                                                        |                                                                                                 |                                                                                                                                                                                                       |
| Surveillance after<br>operations     | Expert opinion,<br>NHS Reference<br>costs 2014/15                               | £258.16 annually after<br>EVAR, £196.79 at 6 weeks<br>after open repair        |                                                                                                 |                                                                                                                                                                                                       |
| Re-intervention<br>after EVAR        | EVAR1 <sup>17</sup>                                                             | £7,546                                                                         |                                                                                                 |                                                                                                                                                                                                       |
| Re-intervention<br>after open repair | EVAR1 <sup>17</sup>                                                             | £8,986                                                                         |                                                                                                 |                                                                                                                                                                                                       |
| <b>Miscellaneous</b>                 |                                                                                 |                                                                                |                                                                                                 |                                                                                                                                                                                                       |
| Non-AAA mortality<br>rate            | ONS                                                                             | ONS 2012-14 data by<br>single year of age, ages 65-<br>94                      | None                                                                                            | None                                                                                                                                                                                                  |
| Overall QoL /<br>utilities           | EuroQoL-5D                                                                      | 0.81 for age 55-64; 0.78<br>for age 65-74, 0.71 for age<br>≥75                 | None                                                                                            | None                                                                                                                                                                                                  |
| QoL harms of<br>screening            | Ashton et al. 2002 <sup>20</sup>                                                | No effect                                                                      | None                                                                                            | Utility decrements of -0.01<br>for AAA diagnosis during<br>surveillance,                                                                                                                              |
| QoL harms of<br>surgery              | EVAR1 <sup>17</sup> ,<br>IMPROVE <sup>18</sup>                                  | No effect                                                                      | None                                                                                            | Utility decrements of -0.02<br>EVAR elective and -0.07<br>Open elective (3 months), -<br>0.04 EVAR emergency and -<br>0.10 Open emergency (3<br>years), -0.10 contraindicated<br>(remaining lifetime) |
| Discounting rates                    | N/A                                                                             | a) Undiscounted<br>b) 3.5% per year for costs,<br>3.5% per year for life-years | None                                                                                            | None                                                                                                                                                                                                  |

211 NAAASP – National Abdominal Aortic Aneurysm Screening Programme

212 NVR – National Vascular Registry

213 HES – Hospital Episodes Statistics

214 EVAR1 RCT – EVAR-1 Randomised Controlled Trial

215 IMPROVE – IMPROVE Randomised Controlled Trial

216

217 \* Slope ( $\beta_1 = 0.052$ ), Intercept ( $\beta_0 = 1.33$ ), Slope log SD ( $\log(\sigma_1) = -3.28$ ), Intercept log SD

218 ( $\log(\sigma_0) = -1.99$ ), Arctanh correlation ( $\text{atanh}(\rho) = 0.41$ ), Residual log SD ( $\log(\sigma_w) = -2.96$ )

219 \*\*  $N(\mu, \Sigma)$  where  $\mu = (0.052 \quad 1.33 \quad -3.28 \quad -1.99 \quad 0.41 \quad -2.96)$ , and

$$\Sigma = \begin{pmatrix} 0.000015 & & & & & \\ 6.5 \times 10^{-6} & 0.000568 & & & & \\ 0.000028 & -0.000752 & 0.009516 & & & \\ 0.000186 & -0.001364 & 0.005153 & 0.011569 & & \\ -0.000125 & -0.000418 & -0.000047 & 0.000843 & 0.011419 & \\ -0.000087 & -0.001800 & 0.002401 & 0.005566 & 0.005260 & 0.013688 \end{pmatrix}$$

220

221 † Association with diameter ( $\gamma_1 = 5.47$ ), Intercept ( $\gamma_0 = -12.40$ )

222 ‡  $N(\mu, \Sigma)$  where  $\mu = (5.47, -12.40)$ , and  $\Sigma = \begin{pmatrix} 1.5892 & -2.2178 \\ -2.2178 & 3.1406 \end{pmatrix}$

223

224

225

226 7. Patient and public involvement

227

228 Public interest groups were set up to support this research by author MJB. No formal qualitative  
229 research was conducted.

230

231 During the development phase of this research men and women attending a public information  
232 event about the management of AAA at the (UK) University Hospitals of Leicester NHS Trust were  
233 invited to join a focus group and assist with the design of this research for the purpose of developing  
234 the funding application. Four men and two women attended an initial meeting in July 2015. All the  
235 men had screen-detected small AAA and one of the women was the partner of one of the men. The  
236 aim of this initial meeting was to establish if screening women for AAA was a public research priority  
237 and explore patient and public priorities to be examined in the research. This contributed to the  
238 overall concept of the research by confirming the general acceptability of screening programmes but  
239 highlighted that one of the key areas of importance to potential patients is the acceptability/risks of  
240 treatment for screen-detected diseases. This confirmed that the proposed aims of the research were  
241 valid and the design was appropriate to meet public research priorities.

242

243 The initial focus group convened in the design phase of the project had significant knowledge of AAA  
244 and AAA screening. To address this another project specific group was established that was  
245 representative of the target population. Through television and radio broadcast interviews in  
246 Leicestershire women were invited to participate in this second focus group. 11 women responded  
247 and attended three meetings over the duration of the project (January 2016, August 2016 and  
248 March 2017). One women had a strong family history of AAA (2 first-degree relatives) and one  
249 woman's husband had previously undergone an AAA repair. The majority (9 women) had family  
250 members who had been affected by AAA. The aim of these meetings was to confirm the findings  
251 from the initial focus group, obtain feedback regarding the aims of the project, to ensure that  
252 outputs were representative of the information relevant to the public and to provide a public  
253 perspective on the overall study results.

254

255 At the initial project specific focus group meeting (January 2016) the concept of screening was  
256 discussed. Evidence for and against screening women for AAA was presented verbally as a means to  
257 start an overall discussion about screening. The overall theme arising from this initial meeting was  
258 that the reassurance of a negative screen would be the main benefit for most women. All members  
259 of the focus group thought that AAA screening should be offered to women. A specific discussion  
260 was held with the focus group regarding the acceptability of treatment (surgery) for AAA. With the  
261 knowledge that AAA repair was a higher risk procedure for women the focus group thought that  
262 most women would want to undergo AAA repair if feasible. The group were asked about whether  
263 they would want to undergo AAA repair if this were indicated, particularly with the knowledge that  
264 women have higher perioperative risk than men. The women thought that providing the overall risks  
265 were considered that most women would want to undergo and AAA repair. The effect of age on  
266 perioperative risk was raised by members of the group who also suggested that older women may  
267 not want screening as they would not want to know or undergo surgery if diagnosed with an AAA.

268

269 A second meeting in August 2016 was used to explore the specific themes of targeting AAA  
270 screening for women at high-risk groups such as smokers. Having previously identified that the main  
271 benefit of screening for most women was the reassurance provided by a negative screening, the  
272 group thought that targeted screening would not be desirable since the main positive effect of  
273 screening would be denied to a large proportion of women.

274

275 A final focus group meeting was held in March 2017. At this meeting the results of the SWAN project  
276 were available. This meeting was first used to re-discuss and clarify the themes identified in the

277 previous meetings. The focus group confirmed that AAA screening was highly acceptable to women  
278 and that they would all attend if invited. They thought that most women would attend if invited. The  
279 group confirmed that screening should be offered to all women rather than being targeted at high  
280 risk groups.

281

282 Following this initial discussion the group were provided with the following written plain English  
283 summary of the results of the SWAN project, written for the National Institute for Health Research  
284 official project report:

285

286 *“Abdominal aortic aneurysms (AAAs) are bulges in the main blood vessel in the abdomen. If an AAA*  
287 *gets too large it can burst (rupture) and this is usually fatal. While an AAA does not usually have any*  
288 *symptoms and is unlikely to cause problems until it bursts, AAAs can be easily diagnosed by a simple*  
289 *ultrasound screening scan. In the UK, men aged 65 are offered an ultrasound scan to look for an AAA*  
290 *and just over 1 in 100 men who are screened have an AAA. Men found to have an AAA are offered an*  
291 *operation to prevent the aneurysm bursting if it is large, or offered regular scans to monitor their*  
292 *AAA if it is small.*

293

294 *Women are not currently screened for AAA, mainly because they are less likely to have AAAs than*  
295 *men. Currently there is no information on whether screening for AAA would save lives from AAA*  
296 *rupture in women, or whether this would be cost-effective for the NHS. In this research we have*  
297 *gathered together a wide range of available information about AAAs in women to find out if screening*  
298 *women for AAA might be effective. We have developed a computer program to analyse all of this*  
299 *information and simulate what would happen if women were screened for AAA.*

300

301 *Our research has shown that if women were offered the same screening as men this would have a very*  
302 *minor effect on the overall life-expectancy of women, gaining on average just over one day of life per*  
303 *woman invited to screening. Although there is considerable uncertainty, we estimate that around 4100*  
304 *women would need to be invited to screening to prevent one death from AAA, and that screening*  
305 *would cost £150,000 per death from AAA prevented.*

306

307 *Based on our findings, a national AAA screening programme for women would not be cost-effective*  
308 *for the NHS.”*

309

310 Following the presentation of this plain English summary the themes previously identified were re-  
311 discussed. Based on the results presented, the women present thought that targeted screening may  
312 be better than no screening at all for women. Despite the negative cost-effectiveness results the  
313 members of the focus group thought that AAA screening would still have significant positive benefits  
314 for most women. The group thought that the positive effects of a normal screening scan should be  
315 investigated as a research priority going forward and that this should be combined with a more  
316 detailed assessment of quality of life in screen-negative women.

317 **Supplementary Results**

318 **Supplementary Figure 2.** A) Cumulative elective operations and B) cumulative emergency operations  
319 in the invited to screening vs. not invited to screening groups in the reference case per 1 million  
320 women. C) Cumulative elective operations and D) cumulative emergency operations in the invited to  
321 screening vs. not invited to screening groups in the best alternative strategy per 1 million women.

322

323 **A**

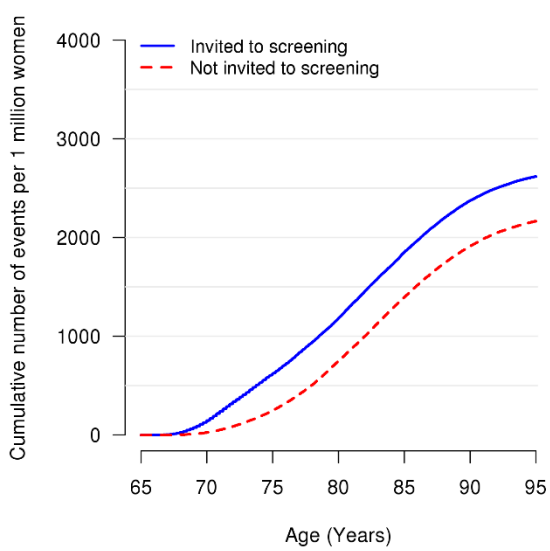

324

325

326

327

328

329

330

331

332

333

334

335

336

337

338

339

340

341

342

343

344

345

346

347

348

**B**

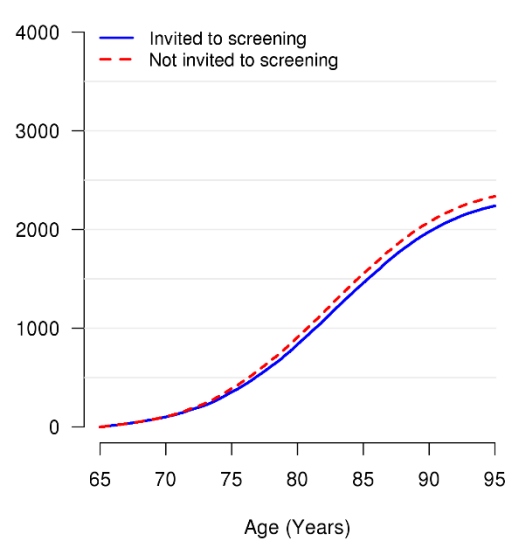

**C**

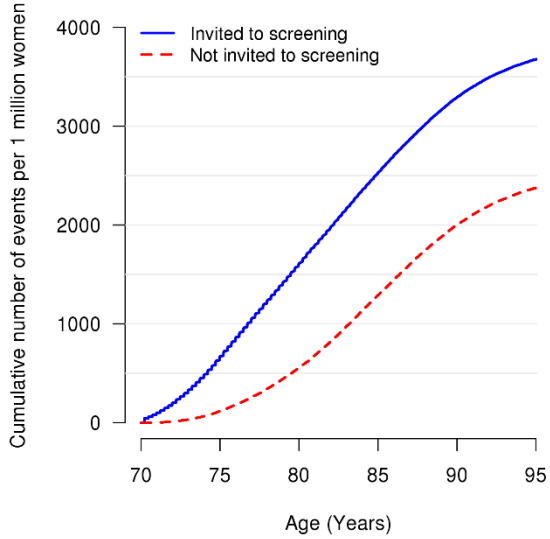

**D**

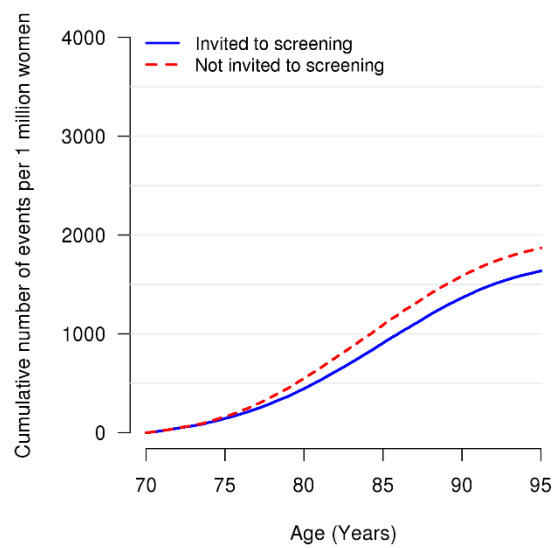

349 **Supplementary Figure 3. Estimates of a) incremental QALYs, b) costs and c) the cost-effectiveness**  
350 **ratio over time in the reference case, up to 30 years after invitation to screening.**

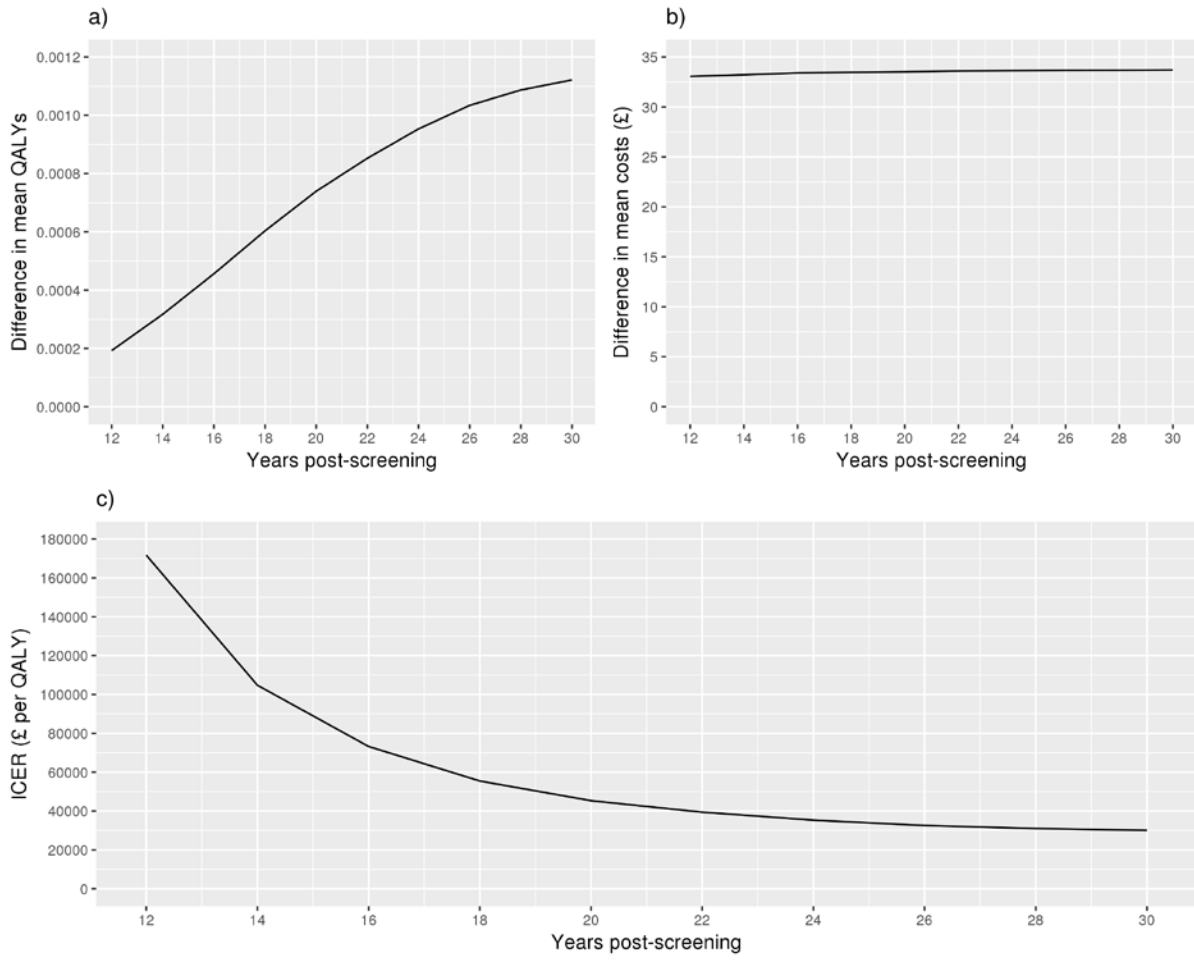

351  
352

353 **Supplementary Figure 4.** Cost-effectiveness of invitation to AAA screening with 1,000 probabilistic  
354 sensitivity analysis iterations for A) the reference case, and B) the best alternative screening  
355 strategy. The blue and red lines indicate willingness-to-pay thresholds of £20,000 and £30,000 per  
356 QALY.

357 QALY – Quality adjusted life-year.

358

359

360

361

362

363

364

365

366

367

368

369

370

371

372

373

374

375

376

377

378

379

380

381

382

383

384

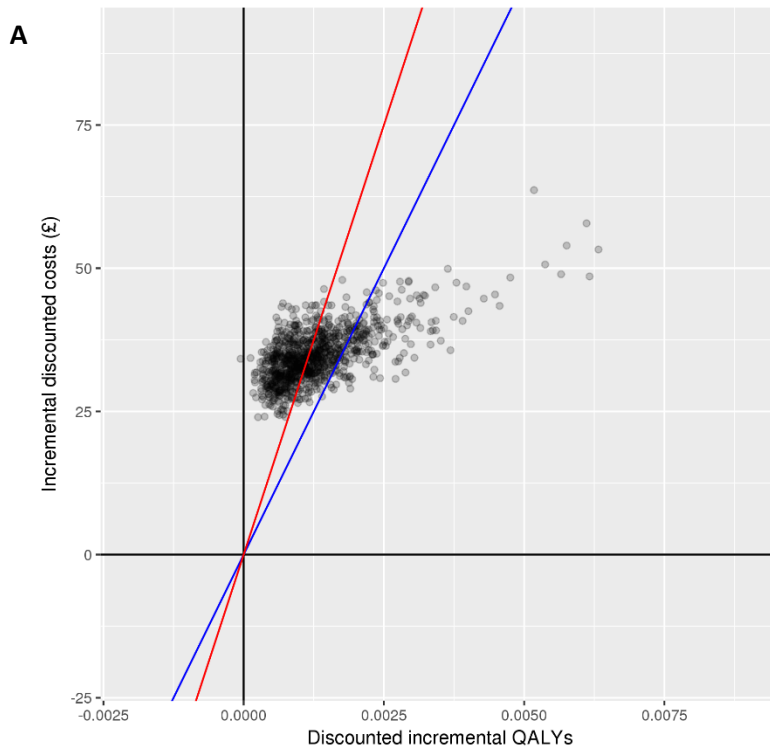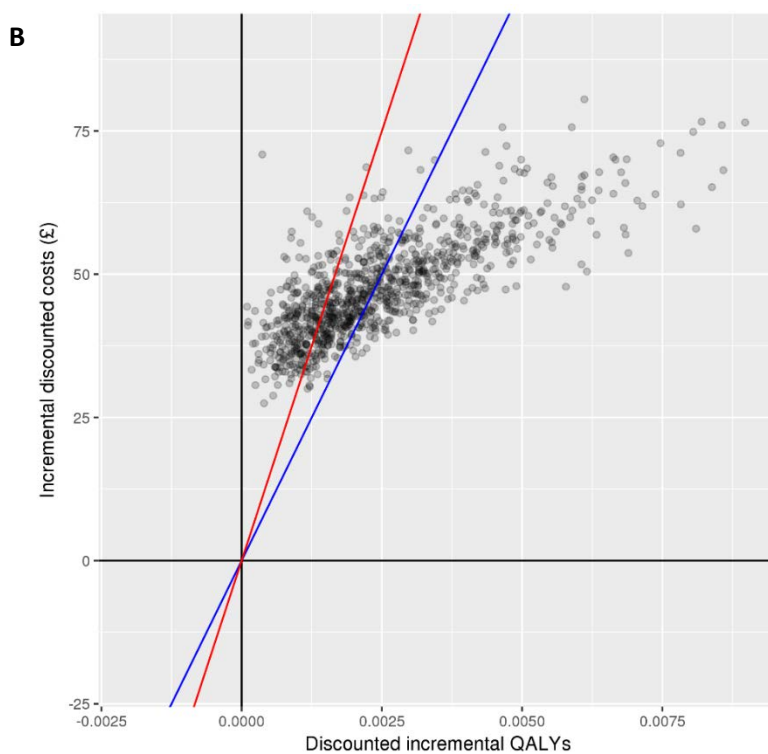



385 **Supplementary Table 2.** Numbers of AAA ruptures in the reference case and best alternative  
 386 strategy, for 1 million women

387

| Number of AAA ruptures                                                     | Reference case           |                      | Best alternative         |                      |
|----------------------------------------------------------------------------|--------------------------|----------------------|--------------------------|----------------------|
|                                                                            | Not invited to screening | Invited to screening | Not invited to screening | Invited to screening |
|                                                                            | N=9,235 (100%)           | N=8,839 (100%)       | N=7,465 (100%)           | N=6,555 (100%)       |
| Screened normal, no further contact                                        | -                        | 4,273 (48%)          | -                        | 1,761 (27%)          |
| Failed to attend (not invited in no screening arm) or non-visualised aorta | 7,465 (81%)              | 2,048 (23%)          | 6,101 (82%)              | 1,991 (30%)          |
| Under surveillance                                                         | 515 (6%)                 | 689 (8%)             | 358 (5%)                 | 646 (10%)            |
| After dropping out of surveillance                                         | 514 (6%)                 | 891 (10%)            | 371 (5%)                 | 1,027 (16%)          |
| After undergoing vascular consultation, but before surgery                 | 44 (0.5%)                | 48 (0.5%)            | 32 (0.4%)                | 41 (0.6%)            |
| After being turned down for surgery                                        | 697 (8%)                 | 890 (10%)            | 603 (8%)                 | 1,089 (17%)          |

388

389

390 **Supplementary Table 3.** Effect of health related quality of life decrements on mean QALYs and the incremental cost-effectiveness ratio

| Quality adjustment                                               | QoL weights                      | Length of change   | Reference case |         |        | Alternative scenario |         |         |
|------------------------------------------------------------------|----------------------------------|--------------------|----------------|---------|--------|----------------------|---------|---------|
|                                                                  |                                  |                    | Mean QALYs     |         | ICER   | Mean QALYs           |         | ICER    |
|                                                                  |                                  |                    | Not invited    | Invited |        | Not invited          | Invited |         |
| Age only                                                         | 0.78 (Age<75)<br>0.71 (Age ≥ 75) | -                  | 10.4484        | 10.4495 | 30,000 | 8.7257               | 8.7277  | 23,000  |
| AAA diagnosis†                                                   | -0.01                            | Under surveillance | 10.4478        | 10.4486 | 43,000 | 8.7247               | 8.7253  | 76,000  |
| Elective surgery‡                                                | -0.02 [EVAR]<br>-0.07 [Open]     | 3 months           | 10.4483        | 10.4495 | 30,000 | 8.7257               | 8.7276  | 23,000  |
| Emergency surgery¥                                               | -0.04 [EVAR]<br>-0.10 [Open]     | 3 years            | 10.4481        | 10.4492 | 30,000 | 8.7255               | 8.7275  | 23,000  |
| Elective surgery contraindicated*                                | -0.10                            | Lifetime           | 10.4479        | 10.4488 | 35,000 | 8.7251               | 8.7266  | 30,000  |
| AAA diagnosis, elective & emergency surgery and contraindication | All of the above                 | As above           | 10.4469        | 10.4476 | 52,000 | 8.7239               | 8.7241  | 278,000 |

391 QoL – Quality of life, QALY – Quality adjusted life-year, ICER – Incremental cost-effectiveness ratio (£ per QALY)

392 † Investigating reduction in EQ-5D of 0.01 from diagnosis to end of surveillance.

393 ‡ Evidence from EVAR-1 randomised controlled trial showed a 3% reduction in QoL for EVAR and a 9% reduction for open repair from 0-3 months post-surgery<sup>17</sup>. Hence, we investigate a reduction of EQ-5D of 0.02 in those undergoing EVAR and 0.07 in those undergoing open repair.

394  
395 ¥ Evidence from IMPROVE trial showed EQ-5D of 0.76 (EVAR) and 0.66 (open repair) at 3 months, 0.78 (EVAR) and 0.71 (open repair) at 12 months and  
396 0.74 (EVAR) and 0.73 (open repair) at 36 months post-surgery<sup>18</sup>. Assuming EQ-5D of zero at operation, a return to usual quality of life by 12 months for  
397 EVAR and 36 months for open repair, we investigate an average reduction in utility of 0.04 and 0.10 for EVAR and open repair, respectively over 3 years.

398 \* Investigating reduction in EQ-5D of 0.10 for remaining life from non-intervention for surgery. Reduced life-years in those contraindicated not accounted for  
399 in the model, likely resulting in too severe a reduction in mean QALYs.

400 **References**

- 401 1. Jacomelli J, Summers L, Stevenson A, Lees T, Earnshaw JJ. Impact of the first 5 years of a  
402 national abdominal aortic aneurysm screening programme. *Br J Surg* 2016; **103**(9): 1125-31.
- 403 2. Svensjö S, Björck M, Wanhainen A. Current prevalence of abdominal aortic aneurysm in 70-  
404 year-old women. *British Journal of Surgery* 2013; **100**(3): 367-72.
- 405 3. Ulug P, Powell J, Sweeting M, Bown M, Thompson S. Meta-analysis of the current prevalence  
406 of screen-detected abdominal aortic aneurysm in women. *British Journal of Surgery* 2016; **103**(9):  
407 1097-104.
- 408 4. Kent KC. Clinical practice. Abdominal aortic aneurysms. *N Engl J Med* 2014; **371**(22): 2101-8.
- 409 5. Thompson SG, Brown LC, Sweeting MJ, et al. Systematic review and meta-analysis of the  
410 growth and rupture rates of small abdominal aortic aneurysms: implications for surveillance  
411 intervals and their cost-effectiveness. *Health technology assessment (Winchester, England)* 2013;  
412 **17**(41): 1-118.
- 413 6. Darwood R, Earnshaw JJ, Turton G, et al. Twenty-year review of abdominal aortic aneurysm  
414 screening in men in the county of Gloucestershire, United Kingdom. *J Vasc Surg* 2012; **56**(1): 8-13.
- 415 7. Glover MJ, Jones E, Masconi KL, Sweeting MJ, Thompson SG, collaborators S. Discrete event  
416 simulation for decision making in health care: lessons from abdominal aortic aneurysm screening.  
417 *Med Decis Making* 2018; **38**(4): 439-51.
- 418 8. Vascular Services Quality Improvement Programme. NVR annual report, 2015.
- 419 9. NHS Digital. Hospital Episode Statistics. 2016.
- 420 10. Sidloff DA, Saratzis A, Sweeting MJ, et al. Sex differences in mortality after abdominal aortic  
421 aneurysm repair in the UK. *Br J Surg* 2017; **104**(12): 1656-64.
- 422 11. Ulug P, Sweeting MJ, von Allmen RS, Thompson SG, Powell JT, SWAN Collaborators.  
423 Morphological suitability for endovascular repair, non-intervention rates, and operative mortality in  
424 women and men assessed for intact abdominal aortic aneurysm repair: systematic reviews with  
425 meta-analysis. *The Lancet* 2017; **389**(10088): 2482-91.
- 426 12. Khashram M, Jones G, Roake J. Prevalence of abdominal aortic aneurysm (AAA) in a  
427 population undergoing computed tomography colonography in Canterbury, New Zealand. *European*  
428 *Journal of Vascular and Endovascular Surgery* 2015; **50**(2): 199-205.
- 429 13. Glover M, Kim L, Sweeting M, Thompson S, Buxton M. Cost-effectiveness of the National  
430 Health Service abdominal aortic aneurysm screening programme in England. *British Journal of*  
431 *Surgery* 2014; **101**(8): 976-82.
- 432 14. Her Majesty's Treasury. The green book: appraisal and evaluation in central government.  
433 London TSO; 2003.
- 434 15. Scott R, Bridgewater S, Ashton H. Randomized clinical trial of screening for abdominal aortic  
435 aneurysm in women. *British Journal of Surgery* 2002; **89**(3): 283-5.
- 436 16. Singh K, Jacobsen BK, Solberg S, et al. Intra- and interobserver variability in the  
437 measurements of abdominal aortic and common iliac artery diameter with computed tomography.  
438 The Tromso study. *Eur J Vasc Endovasc Surg* 2003; **25**(5): 399-407.
- 439 17. Patel R, Sweeting MJ, Powell JT, Greenhalgh RM, investigators Et. Endovascular versus open  
440 repair of abdominal aortic aneurysm in 15-years' follow-up of the UK endovascular aneurysm repair  
441 trial 1 (EVAR trial 1): a randomised controlled trial. *Lancet* 2016; **388**(10058): 2366-74.
- 442 18. IMPROVE Trial Investigators. Comparative clinical effectiveness and cost effectiveness of  
443 endovascular strategy v open repair for ruptured abdominal aortic aneurysm: three year results of  
444 the IMPROVE randomised trial. *BMJ* 2017; **359**: j4859.
- 445 19. Thompson SG, Ashton HA, Gao L, Buxton MJ, Scott RA, Multicentre Aneurysm Screening  
446 Study Group. Final follow-up of the Multicentre Aneurysm Screening Study (MASS) randomized trial  
447 of abdominal aortic aneurysm screening. *Br J Surg* 2012; **99**(12): 1649-56.
- 448 20. Ashton H, Buxton M, Day N, Kim L, Marteau T, Scott R. The Multicentre Aneurysm Screening  
449 Study (MASS) into the effect of abdominal aortic aneurysm screening on mortality in men: a  
450 randomised controlled trial. *The Lancet* 2002; **360**(9345): 1531-9.
